# Supplementary material
Source: HighWire-hosted journal article supplement (https://www.cmaj.ca/highwire/filestream/59165/field_highwire_adjunct_files/3/lung-liu-4-at.pdf)
Supplement: lung-liu-4-at.pdf [file lung-liu-4-at.pdf]

#### Appendix 4 (as supplied by the authors): Subgroup analyses of dichotomous outcome data

| Stratification               | No. of patients | Studies | RR (95% CI)      | P value | I <sup>2</sup> (%) |
|------------------------------|-----------------|---------|------------------|---------|--------------------|
| <b>Lung injury</b>           |                 |         |                  |         |                    |
| Risk of bias                 |                 |         |                  |         |                    |
| Low                          | 679             | 5       | 0.41 (0.16–1.05) | 0.064   | 0                  |
| Unclear/high                 | 173             | 3       | 0.27 (0.77–1.07) | 0.062   | 0                  |
| Surgical setting             |                 |         |                  |         |                    |
| Cardiothoracic               | 311             | 5       | 0.35 (0.15–0.86) | 0.022   | 0                  |
| Abdominal                    | 541             | 3       | 0.41 (0.08–2.11) | 0.284   | 11.1               |
| Tidal volume gradient, mL/kg |                 |         |                  |         |                    |
| 5–6                          | 452             | 7       | 0.41 (0.18–0.93) | 0.034   | 0                  |
| 7–8                          | 400             | 1       | 0.17 (0.02–1.37) | 0.096   | /                  |
| <b>Pulmonary infection</b>   |                 |         |                  |         |                    |
| Risk of bias                 |                 |         |                  |         |                    |
| Low                          | 679             | 4       | 0.42 (0.19–0.92) | 0.03    | 42.0               |
| Unclear/high                 | 141             | 3       | 0.64 (0.11–3.79) | 0.622   | 0                  |
| Surgical setting             |                 |         |                  |         |                    |
| Cardiothoracic               | 279             | 4       | 0.48 (0.23–1.02) | 0.056   | 0                  |
| Abdominal                    | 541             | 3       | 0.47 (0.15–1.51) | 0.203   | 45.8               |
| Tidal volume gradient, mL/kg |                 |         |                  |         |                    |
| 5–6                          | 420             | 6       | 0.59 (0.32–1.08) | 0.089   | 0                  |
| 7–8                          | 400             | 1       | 0.19 (0.06–0.63) | 0.007   | /                  |
| <b>Atelectasis</b>           |                 |         |                  |         |                    |
| Risk of bias                 |                 |         |                  |         |                    |
| Low                          | 526             | 3       | 0.41 (0.23–0.72) | 0.002   | 0                  |
| Unclear/high                 | 151             | 4       | 0.92 (0.42–1.98) | 0.823   | 45.6               |
| Surgical setting             |                 |         |                  |         |                    |
| Cardiothoracic               | 166             | 3       | 1.06 (0.31–3.62) | 0.931   | 0                  |
| Abdominal                    | 495             | 3       | 0.42 (0.26–0.70) | 0.001   | 0                  |
| Tidal volume gradient, mL/kg |                 |         |                  |         |                    |
| 5–6                          | 222             | 5       | 1.21(0.75–1.98)  | 0.437   | 0                  |
| 7–8                          | 455             | 2       | 0.36 (0.21–0.64) | 0.000   | 0                  |

*continued*

## Appendix 4 continued

| Stratification               | No. of patients | Studies | RR (95% CI)      | <i>P</i> value | <i>I</i> <sup>2</sup> (%) |
|------------------------------|-----------------|---------|------------------|----------------|---------------------------|
| <b>Mortality</b>             |                 |         |                  |                |                           |
| Risk of bias                 |                 |         |                  |                |                           |
| Low                          | 679             | 5       | 0.80 (0.37–1.73) | 0.571          | 0                         |
| Unclear/high                 | 471             | 8       | 0.58 (0.12–2.71) | 0.484          | 0                         |
| Surgical setting             |                 |         |                  |                |                           |
| Cardiothoracic               | 554             | 9       | 0.68 (0.18–2.60) | 0.578          | 0                         |
| Abdominal                    | 596             | 4       | 0.77 (0.35–1.74) | 0.534          | 0                         |
| Tidal volume gradient, mL/kg |                 |         |                  |                |                           |
| 5–6                          | 655             | 10      | 0.68 (0.28–1.68) | 0.404          | 0                         |
| 7–8                          | 495             | 3       | 0.86 (0.29–2.51) | 0.778          | /                         |

Note: CI = confidence interval, RR = relative risk.
